# Supplementary material
Source: Springer Nature journal article supplement (https://www.springermedizin.de/resource/supplementary/12939_2013_404_MOESM1_ESM.pdf/9551092)

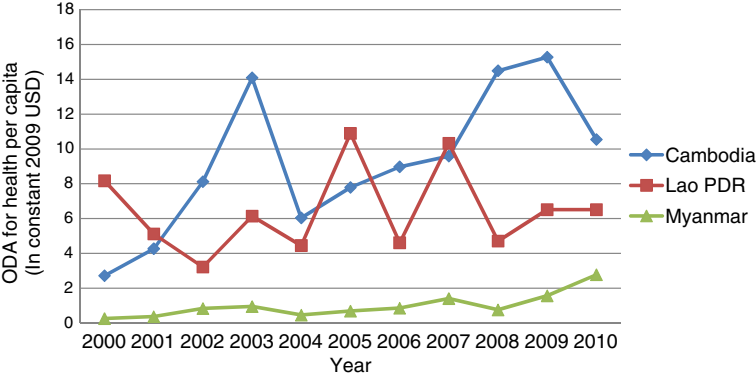

Source: World Health Organization, Global Health Observatory

Supplement: MOESM1 [file 9551092]
